# Supplementary material for: Multichannel Analysis of Surface Waves (MASW) for the internal characterisation of the Flüela rock glacier: overcoming the limitations of seismic refraction tomography
Source: Copernicus journal article supplement (doi:10.5194/egusphere-2025-962), 2025-03-25
Supplement: Supplementary file [file egusphere-2025-962-RC2-supplement.pdf]

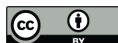

# 1      **Multichannel Analysis of Surface Waves (MASW) for the** 2                    **internal characterisation of the Flüela rock glacier:** 3      **overcoming the limitations of seismic refraction tomography**

4      Ilaria Barone<sup>1</sup>, Alexander Bast<sup>2,3</sup>, Mirko Pavoni<sup>1</sup>, Steven Javier Gaona Torres<sup>1</sup>, and Jacopo  
5      Boaga<sup>1</sup>

6      <sup>1</sup> Department of Geosciences, University of Padova, Padua, Italy

7      <sup>2</sup> WSL Institute for Snow and Avalanche Research SLF, Permafrost Research Group, Davos Dorf, Switzerland

8      <sup>3</sup> Climate Change, Extremes and Natural Hazards in Alpine Regions Research Center CERC, Davos Dorf,  
9      Switzerland

10      *Correspondence to:* Ilaria Barone ([ilaria.barone@unipd.it](mailto:ilaria.barone@unipd.it)) and Mirko Pavoni ([mirko.pavoni@unipd.it](mailto:mirko.pavoni@unipd.it))

11      **Abstract.** A multi-method geophysical campaign was carried out to characterize the subsurface of the Flüela rock  
12      glacier, Grisons, Switzerland, using electrical resistivity tomography (ERT), seismic refraction tomography (SRT)  
13      and multichannel analysis of surface waves (MASW). Surface wave analysis is not commonly used in mountain  
14      permafrost environments, although it could be applied to any dataset acquired for conventional SRT analysis if  
15      collected with low-frequency geophones. Here, we show that the use of the MASW method can be efficiently  
16      applied to highlight the presence of an ice-bearing layer, thus overcoming potential limitations of the common  
17      SRT analysis in these environments, such as tackling velocity inversions at depth or identifying layers which are  
18      invisible due to the lack of head wave arrivals. Our results are corroborated by synthetic models that simulate the  
19      propagation of seismic waves in a mountain permafrost environment with changing ice and water contents.

20

21      **Keywords:** multichannel analysis of surface waves (MASW); electrical resistivity tomography (ERT); seismic  
22      refraction tomography (SRT); mountain permafrost hydrology; rock glacier hydrology; ground ice content.

## 23      **1 Introduction**

24      The warming and degradation of European mountain permafrost (PERMOS, 2020; Noetzli et al., 2024) facilitates  
25      the formation and dynamics of alpine mass movements such as rock falls, landslides or debris flows (Arenson and  
26      Jakob, 2014; Kofler et al., 2021; Bast et al., 2024a; Jacquemart et al., 2024), and hence, may impact human safety  
27      and infrastructure (Arenson and Jakob, 2017; Duvillard et al., 2019). Consequently, in densely populated  
28      mountain regions such as the European Alps, there is a significant demand for reliable tools to map and  
29      characterise permafrost environments, accurately assess associated risks, and apply practical solutions for the  
30      construction and maintenance of durable infrastructure (e.g., Bommer et al., 2010).

31      Rock glaciers are common, widespread, often tongue-shaped debris landforms found in periglacial mountain  
32      environments containing ice, rocks, air and water (Kellerer-Pirklbauer et al., 2024; Haeberli et al., 2006;

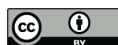

33 RGIK, 2022). They form in the deposition zones of snow avalanches and rock fall (Kenner et al. 2019) and  
34 develop over centuries to millennia (Krainer et al., 2015; Haeberli et al., 1999) due to past or ongoing creep  
35 (RGIK, 2022), resulting from internal deformation within the permafrost ice and shearing at distinct horizons  
36 (Arenson et al., 2002; Cicoira et al., 2021). In the past two decades, the creep rate of rock glaciers has generally  
37 increased, and this is often linked to climate change (Kellerer-Pirkelbauer et al., 2024; PERMOS 2020, Hu et al.  
38 2025).

39 Rock glaciers have primarily been studied from geomorphological, climatic, and kinematic perspectives, with less  
40 focus on their hydrological aspects (e.g., Bast et al., 2024b; Cicoira et al., 2019; Haeberli et al., 2006; Hu et al.,  
41 2025; Kellerer-Pirkelbauer et al., 2024; Kenner et al., 2020), as also highlighted by recent reviews by Arenson et  
42 al. (2022) and Jones et al. (2019). This gap in understanding arises because of the complexity of the distribution  
43 of ice and water in rock glaciers. The relation between rock glacier kinematics and their hydrology is also complex,  
44 influenced by factors such as variable surface cover and groundwater flow, which affect infiltration rates, heat  
45 transfer and reaction times (Arenson et al., 2022). Nevertheless, understanding rock glacier hydrology is essential  
46 to comprehend rock glacier velocities, i.e. kinematics, and their potential impacts on alpine mass movements.

47 Water can exist within rock glaciers as seasonally frozen in the active layer, as perennially frozen ice in the  
48 permafrost body, or perennially unfrozen in liquid form in taliks. Permafrost primarily influences water flow paths  
49 by acting as a physical barrier that restricts movement (Arenson et al., 2022). Conceptual models (Giardino et al.,  
50 1992), alongside geochemical (Krainer and Mostler, 2002; Krainer et al., 2007) and geophysical studies (Pavoni  
51 et al., 2023a), suggest that a continuous ice-rich frozen layer functions as an aquiclude, separating supra-  
52 permafrost flow caused by snow and ice melt, as well as precipitation, from a deeper sub-permafrost flow (Jones  
53 et al. 2019). However, the stratigraphy and the bedrock under rock glaciers are often very heterogeneous over  
54 short distances, complicating the hydrology (Bast et al., 2024b; Boaga et al., 2020). The thermal state of the  
55 ground also plays a critical role, as liquid water can exist below 0°C due to factors such as water salinity, high  
56 clay content, or pressure (Arenson et al., 2022; Arenson and Sego, 2006; Bast et al., 2024b; Williams, 1964). This  
57 affects the unfrozen water content and hydraulic conductivity and may lead to intra-permafrost flow, confined  
58 water layers or water pockets. Furthermore, heat transport by flowing water can facilitate thawing in specific  
59 regions, for instance, leading to the development of taliks (Arenson et al., 2022).

60 Although boreholes provide the most accurate information on the internal structure of rock glaciers (Arenson et  
61 al., 2002) and allow the monitoring of subsurface properties through specialised sensors such as high-accuracy  
62 piezoresistive level probes with temperature sensors or inclinometers (Bast et al., 2024b; Phillips et al., 2023;  
63 Arenson et al., 2002), they only offer point data, they are expensive and are challenging to install in high mountain  
64 environments. Geophysical methods are, therefore, often used to achieve a more detailed characterisation of the  
65 subsurface and a spatial extent (e.g., Scott et al., 1990; Hauck and Kneisel, 2008).

66 Among the different geophysical techniques, electrical resistivity tomography (ERT) and seismic refraction  
67 tomography (SRT) methods are widely used to estimate the structure and internal composition of rock glaciers  
68 (Wagner et al., 2019; Pavoni et al., 2023b; Hauck et al., 2011). On the other hand, the multichannel analysis of  
69 surface waves (MASW; Park et al., 1999), commonly applied for civil engineering purposes (Park et al., 2018;  
70 Olafsdottir et al., 2024), has rarely been applied in mountain permafrost environments (Guillemot et al., 2021;  
71 Kuehn et al., 2024). Nevertheless, a seismic shot gathering acquired with low-frequency vertical geophones (e.g.,  
72 with a 4.5 Hz natural frequency) not only records the first arrivals of direct and refracted P-waves but also

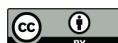

Rayleigh waves, whose propagation is mainly sensitive to S-wave velocities ( $V_s$ ). Thus, the application of the MASW method can potentially allow the retrieval of a  $V_s$  profile (Socco et al., 2010), complementing the SRT method, which typically focuses on P-wave velocities ( $V_p$ ). The MASW method offers several advantages over the SRT technique: i) it can reveal velocity inversions in the subsurface, such as a lower velocity layer between two higher velocity layers, ii) the retrieved S-wave velocities are insensitive to the liquid phase present in the medium, and iii) it can provide quantitative information regarding the subsurface mechanical properties like the shear modulus and Young's modulus, for geotechnical characterisation (Park et al., 2007).

In this study, we applied the MASW method along a seismic line that was acquired next to an ERT line at the Flüela rock glacier, Grisons, Switzerland. ERT suggests the presence of an ice-bearing layer in the upper part of the rock glacier tongue, which disappears towards the front. The SRT analysis clearly detects the basal bedrock but surprisingly does not reveal the typical P-wave velocities of the ice-bearing layer. In fact, the SRT results suggest the typical  $V_p$  values of liquid water, thus masking the presence of the ice-bearing layer. On the other hand, the  $V_s$  models obtained from the MASW results are in very good agreement with the ERT findings. Therefore, we hypothesise the presence of a thin water-saturated sediment layer atop the ice-bearing layer (supra-permafrost flow), which would inhibit the penetration of P-waves. To support our hypothesis, we carried out a full-wave forward modelling and produced synthetic shot gathers. Subsequently, we compared synthetic with field data, both in terms of surface wave dispersion and P-wave first-arrival times.

## 2 Study site and data acquisition

The lower lobe of the Flüelapass rock glacier complex (referred to here as the Flüela rock glacier; 46.746° N, 9.951° E) is located in the Eastern Swiss Alps, next to the Flüelapass road in the Community of Zernez, Grisons, at the top of the mountain pass (Figs. 1a and 1b). The active rock glacier, ranging from 2380-2500 m asl., is nourished by the surrounding steep rock walls, which are composed of amphibolite and paragneiss (Bast et al., 2025). The lower investigated tongue of the rock glacier (Fig. 1c) creeps downwards with surface velocities ranging between ~ 10 and ~ 30 cm/year (R. Kenner, SLF, personal communication, based on annual terrestrial laser scans, 2024). The surface material consists of rock debris and boulders of various sizes, along with smaller isolated patches of finer sediments and sparse vegetation (Figs. 1c and 1d).

A first study of the Flüela rock glacier by Haeberli (1975) applied refraction seismics to investigate the presence of permafrost ice. The seismic profiles obtained indicated permafrost at around 10 m depth in the rock glacier front and ice-rich permafrost below approximately 4 m towards the central lower area of the rock glacier. More recent geophysical research by Boaga et al. (2024) and Bast et al. (2025) confirmed the presence of the ice-bearing layer. Research on permafrost distribution and evolution at the Flüelapass primarily concentrated on a talus slope located approximately 500 m west-northwest, where two boreholes were drilled in 2002 (Lerjen et al., 2003; Phillips et al., 2009; Kenner et al., 2017). As for the lower tongue investigated here, no borehole information is available.

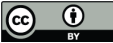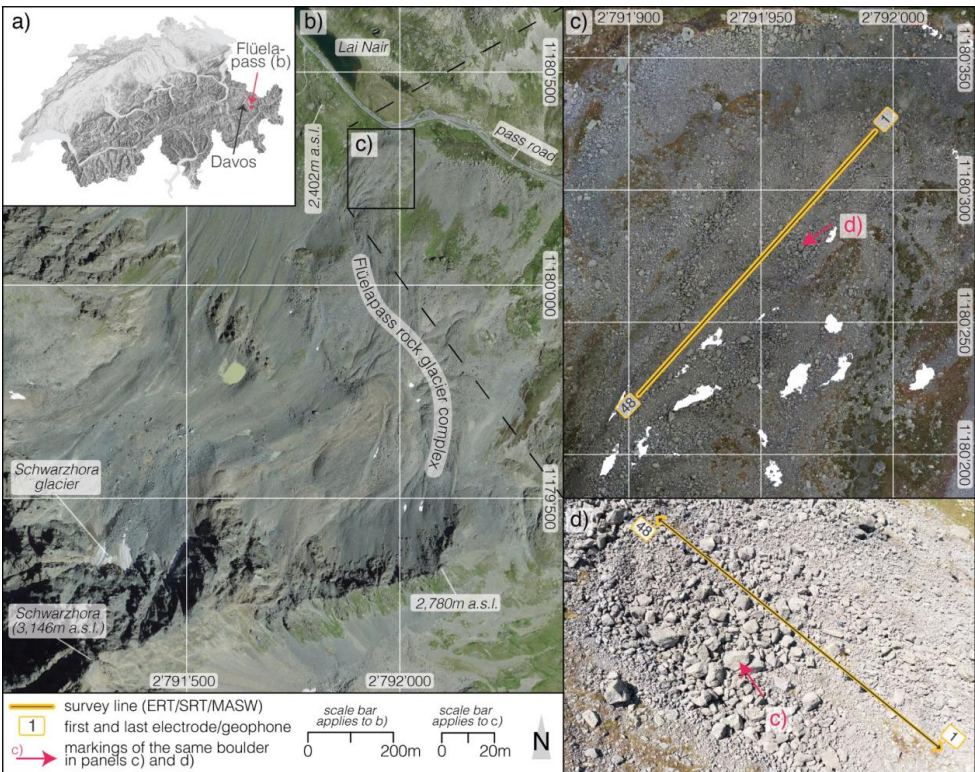

**Figure 1: (a) Location of the Flüelapass in Switzerland. (b) Aerial image of the Flüelapass featuring the Flüelapass rock glacier complex, with markers for orientation (summit, lake, road) and elevation points. (c) A zoomed-in drone ortho mosaic (flight date 28 June 2023) of the investigated lower lobe of the rock glacier complex, highlighting the survey line (electrical resistivity and seismic data, yellow-grey line). The red arrow indicates the same boulder as in the oblique drone image (d). The drone image reveals the coarse and rough surface within the middle section of the survey line (please note that the survey line extends further NW and SW). Basemaps in a) SwissAlti3D multidirectional hillshade and b) SwissImage (flight year 2022) are provided by swisstopo (<https://map.geo.admin.ch>). Note that the legend and North arrow applies to all map sections (a-c).**

On 03 August 2024, we collected both electrical resistivity tomography (ERT) and seismic data on the rock glacier. The measurements were collected along a line of approximately 133 m in the middle of the lobe (Figs. 1c and 1d). For data collection, we used 48 electrodes for the ERT and 48 geophones for the seismics, with a spacing of 3 m. We measured all electrode/geophone positions with a Stonex S800 GNSS instrument (Stonex, Paderno Dugnano, Italy; [www.stonex.it](http://www.stonex.it)) to obtain a detailed topographic profile along the survey line. The ERT dataset was collected with a Syscal Pro Switch 48 resistivity meter (IRIS Instruments, Orléans, France; [www.iris-instruments.com](http://www.iris-instruments.com)). This was done with a dipole-dipole multi-skip acquisition scheme (Pavoni et al., 2023a), with reciprocal measurements and stacking ranging from 3 to 6 (Day-Lewis et al., 2008), for a total of 3542 measured data points. To ensure a good galvanic coupling, i.e., optimal contact resistances, and to obtain a high-quality dataset (Pavoni et al., 2022), conductive textile sachets, wet with salt water, were used as electrodes (Buckel et al., 2023; Bast et al., 2025).



129 The seismic data were collected with two Geode seismographs (Geometrics, San Jose, USA;  
130 <http://www.geometrics.com>), using vertical low-frequency geophones with a natural frequency of 4.5 Hz and a  
131 20 kg sledgehammer as a seismic source. The source was moved from the first to the last geophone with a distance  
132 of six metres between each position, resulting in a total of 24 acquisition positions. At each position, the shot was  
133 repeated twice to stack the seismograms and enhance the signal-to-noise ratio.

### 134 3 MASW Method

135 Surface waves are seismic waves that travel along the Earth's surface, characterised primarily by dispersion, i.e.,  
136 different frequencies propagate at different velocities (Everett, 2013). By analysing surface wave dispersion, it is  
137 possible to infer different mechanical properties of the medium through which the surface waves propagate (Socco  
138 et al., 2010). The depth of investigation of surface waves is associated with the seismic wavelength; a general rule  
139 of thumb is to consider one-third to one-half of the seismic wavelength of the lowest frequency component as the  
140 maximum penetration depth (Foti et al., 2015). Surface waves are also characterised by multi-modal propagation,  
141 meaning they can propagate in multiple modes simultaneously, including the fundamental mode and higher-order  
142 modes. The fundamental mode is the simplest form of wave propagation, with higher sensitivity near the surface,  
143 typically showing lower propagation velocities and higher amplitudes. Higher-order modes involve more complex  
144 sensitivity patterns with depth, can penetrate deeper layers, and usually exhibit higher velocities and lower  
145 amplitudes. However, the energy distribution of surface waves over different modes strongly depends on the  
146 subsurface conditions, and if higher modes with significant amplitude are present, special attention must be  
147 devoted to identifying the different modes (Boaga et al., 2013).

148 Surface wave analysis allows the retrieval of the dispersion relation (phase/group velocity versus frequency). In  
149 particular, the Multichannel Analysis of Surface Waves (MASW; Park et al., 1999) uses linear arrays to record  
150 the surface wave propagation from an active source in the time-space domain (seismogram). The acquisition setup  
151 is identical to SRT, but low-frequency geophones, having typically a natural frequency of 4.5 Hz, are essential  
152 for MASW surveys. The seismogram is converted into a frequency-wavenumber (f-k) or frequency-velocity (f-v)  
153 spectrum, where the energy maxima corresponding to the different modes are picked. Depth inversion is finally  
154 needed to retrieve a 1D Vs profile. Inversion is a non-linear ill-posed problem that can be solved deterministically  
155 using the linearized iterative least-squares approach (Herrmann, 1987), or with a stochastic search method, such  
156 as the neighbourhood algorithm (Sambridge, 1999). In both cases, some preliminary information is needed to  
157 define the starting model (deterministic approach) or the parameter space (stochastic approach).

158 The MASW method assumes homogeneous lateral conditions under the recording array. This condition is hardly  
159 met in nature, and when strong lateral heterogeneities are present, the complexity of the resulting spectra could  
160 challenge the picking process. For this reason, MASW is sometimes applied using moving windows. In this case,  
161 a quasi-2D Vs profile is retrieved, and smooth lateral velocity variations can be identified (Bohlen et al., 2004;  
162 Boiero and Socco, 2011). The selection of the moving window length is crucial and requires preliminary testing:  
163 a shorter window length causes an increase in lateral resolution but decreases the spectral resolution.

164



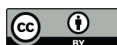

## 4 ERT, SRT and MASW data processing, results and interpretation

### 4.1 ERT and SRT

The ERT data processing was conducted using the open-source Python-based software *ResIPy* (Blanchy et al., 2020), filtering the quadrupoles with reciprocal and stacking errors exceeding 5 %, which was considered as the expected data error in the inversion modelling (Day-Lewis et al., 2008). The inverted resistivity model (Fig. 2a) was found in two iterations and with a final RMS (Root-Mean Square) misfit of 1.17.

SRT data processing was performed with the open-source C++/Python-based library *pyGIMLi* (Rücker et al., 2017). In each seismogram, the first-arrival times were picked three times to calculate the standard deviation and define the picking error (1 ms) for the inversion process (Bauer et al., 2010). The inverted P-wave velocity ( $V_p$ ) model (Fig. 2b) was found in five iterations and with a final  $\chi^2$  (chi-square) misfit of 1.31.

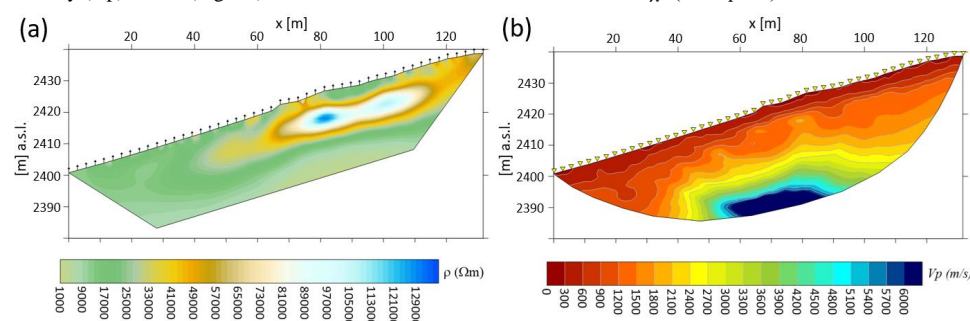

**Figure 2: (a) The inverted ERT section, after two iterations, has an expected data error of 5% and a final RMS misfit of 1.17. The black markers along the surface indicate the positions of the electrodes. (b) The inverted P-wave velocity model (SRT), after five iterations, has a picking error of 1 ms and a final  $\chi^2$  misfit of 1.31. The yellow triangular markers along the surface indicate the positions of the geophones.**

In the upper 4 - 5 m of the ground, electrical resistivity values are relatively high ( $\sim 20 \text{ k}\Omega\text{m}$ ), and  $V_p$  values are particularly low ( $< 600 \text{ m/s}$ ). This indicates a highly porous layer composed of blocks and debris with low fine sediment content. Towards the front of the rock glacier ( $x < 40 \text{ m}$ ) and at greater depths, the electrical resistivity decreases ( $< 10 \text{ k}\Omega\text{m}$ ), and the  $V_p$  values gradually increase, reaching 1200-1500 m/s at the bottom of the model. Here, the substrate appears more heterogeneous, consisting of a mix of coarse debris and finer sediments. Towards the upper section of the rock glacier lobe, at 4 - 5 m depth, resistivities increase ( $\sim 40 \text{ k}\Omega\text{m}$ ) for  $40 \text{ m} < x < 60 \text{ m}$ , with an even sharper rise to values  $> 80 \text{ k}\Omega\text{m}$  for  $x > 60 \text{ m}$ . These values are typical for an ice-bearing frozen layer (Hauck and Kneisel, 2008). This layer extends to a depth of 10 - 12 m before resistivities clearly decrease to a few  $\text{k}\Omega\text{m}$  at the bottom of the model. In the  $V_p$  model, values increase at greater depths, with a steep gradient at  $\sim 20 \text{ m}$  depth ( $50 < x < 80 \text{ m}$ ), where  $V_p$  values reach 6000 m/s, indicating the bedrock. In the upper part of the section, between 4 - 5 m and 10 - 12 m depth, no typical  $V_p$  values of an ice-bearing frozen layer are reached ( $V_p > 2500 \text{ m/s}$ , Hauck and Kneisel, 2008). Therefore, in this area, the ERT and SRT results are inconsistent: while the inverted resistivity model clearly indicates an ice-bearing layer, the  $V_p$  model shows a moderate increase, peaking at  $V_p$  values  $\sim 1500 \text{ m/s}$ , likely corresponding to a liquid water-saturated layer.

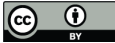

#### 197 4.2 MASW

198

199 The MASW analysis was performed using a moving window of 24 channels, striking a balance between spatial  
 200 and spectral resolution. An offset-dependent mute was applied to those shot gathers that presented at least one  
 201 source bounce as this could significantly impact the subsequent phase measurements. The time of occurrence of  
 202 the source bounces was automatically identified through the auto-correlation of the near-offset traces. The mute  
 203 was finally applied to the seismogram to mask the source bounce. Each shot gather was then Fourier transformed  
 204 in both time and space to obtain the corresponding f-k spectrum, from which the fundamental mode was manually  
 205 picked. The retrieved dispersion curves were depth inverted using *Dinver* (Wathelet, 2008), an open-source tool  
 206 included in *Geopsy* (<https://www.geopsy.org/>; last access: 28 February 2025) that performs a stochastic inversion  
 207 based on the neighbourhood algorithm (Sambridge, 1999). *Dinver* requires the definition of the model space with  
 208 a fixed number of layers. We used a four-layer model and parameterized each layer with a wide range of seismic  
 209 velocities and Poisson ratios, plausible for rock glacier environments while keeping the density constant (Tab. 1).  
 210 *Dinver* generates a multitude of random models within the model space and calculates for each of these models  
 211 the misfit between observed and modelled dispersion curves. The final model is characterised by the minimum  
 212 misfit.

213 **Table 1: Parameter space used for the dispersion curve inversion with the open-source tool *Dinver* (Wathelet, 2008).**

214 **Abbreviations: Vp: P-wave velocities, Vs: S-wave velocities,  $\rho$ : density.**

|         | Thickness [m] | Vp [m/s]    | Vs [m/s]   | Poisson ratio | $\rho$ [kg/m <sup>3</sup> ] |
|---------|---------------|-------------|------------|---------------|-----------------------------|
| 1       | 2 - 12        | 400 - 1000  | 200- 500   | 0.2 - 0.45    | 1800                        |
| 2       | 2 - 12        | 800 - 5000  | 500 - 2500 | 0.2 - 0.45    | 2000                        |
| 3       | 2 - 12        | 800 - 5000  | 500 - 2500 | 0.2 - 0.45    | 2000                        |
| Bedrock | Infinite      | 2400 - 6000 | 1200- 3000 | 0.2 - 0.45    | 2200                        |

215

216 Figure 3 shows the results of the picking (Fig. 3c and 3d) and the Vs models (Fig. 3e and 3f) derived from the  
 217 inversion of two dispersion curves. The first curve refers to a shot placed on the left side and the first 24 geophones  
 218 (Fig. 3a), while the second curve relates to a shot on the right side and the last 24 geophones (Fig. 3b). Despite  
 219 the noisy character of the seismograms, where strong scattering is observed, the f-k spectra show coherent energy  
 220 and at least one mode of propagation is clearly recognisable, assumed to be the fundamental mode (Fig. 3c and 3d).  
 221 The two spectra show different frequency and wavenumber distributions, indicating different subsurface  
 222 conditions. The maximum penetration depth, which is approximately half of the wavelength, can be computed  
 223 from the minimum picked frequency, and it is about 15 m. The inversion results reveal a smooth increase of  
 224 velocity with depth in the left part of the section, i.e., towards the front of the rock glacier (Fig. 3e), while it clearly  
 225 highlights a shallow (5 m depth) high-velocity layer (2000 m/s) on the right side, i.e., the upper part of the rock  
 226 glacier (Fig. 3f). The high-velocity layer has a thickness of approximately 5 m. At a depth of 10 m, a clear and  
 227 sharp decrease in the velocity is observed. Good convergence is reached in the inversion down to the maximum  
 228 sensitivity of 15 m. Below this depth, results should be treated with caution. The lack of convergence manifests

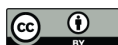

229 as a wide velocity range with a similar misfit: most models in this depth range are equally plausible. Lower-  
 230 frequency data is needed to constrain the inversion at greater depths. It is important to note that the limited  
 231 frequency range characterising the picked dispersion curves is partly due to the loss of high frequency from  
 232 scattering and partly to the presence of a high-impedance boundary (the top of the bedrock in the left half of the  
 233 section and the top of the frozen layer on the right) that likely prevents most of the low-frequency energy from  
 234 penetrating below.  
 235

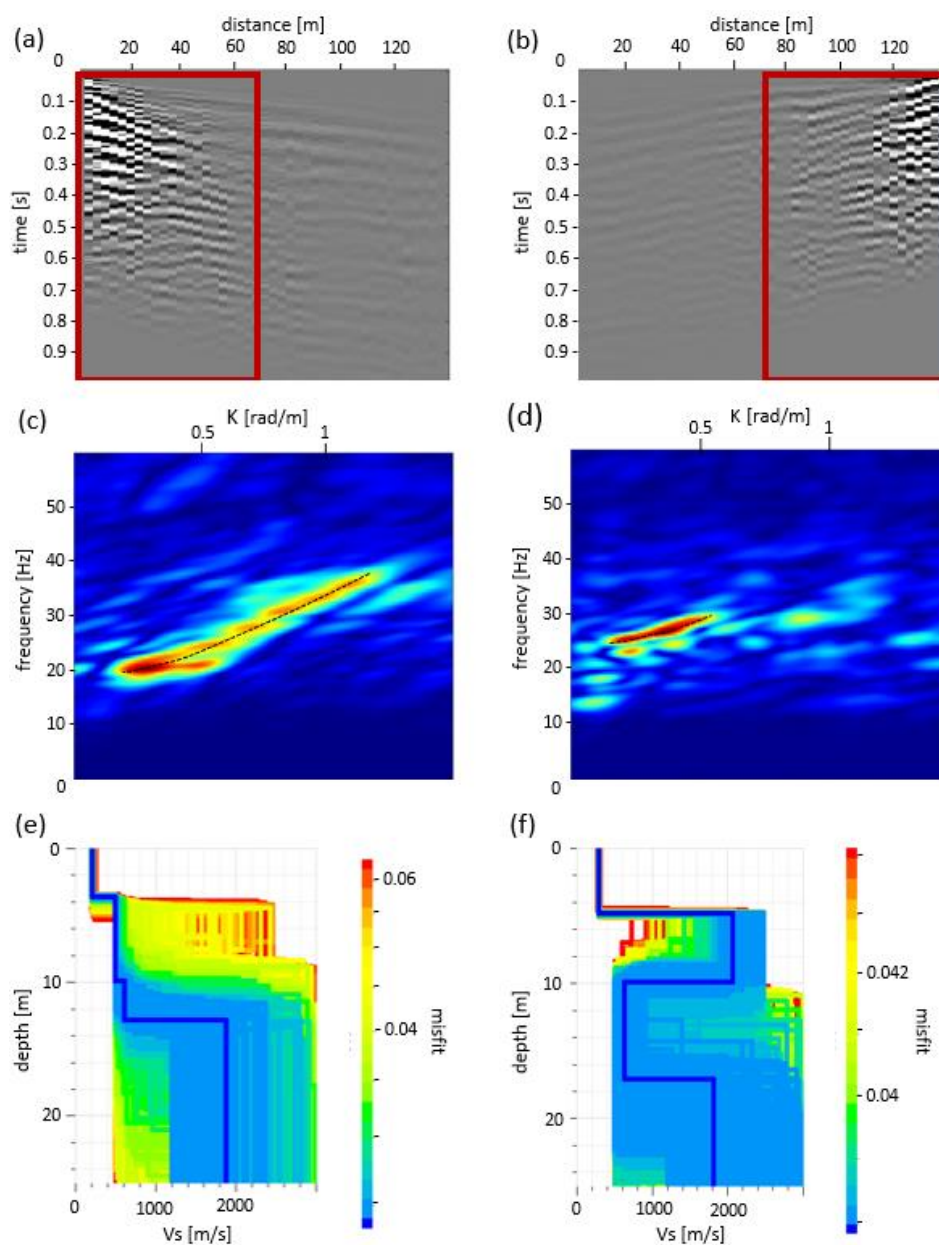

236





Figure 3: (a) Seismogram (grayscale) of the leftmost shot, where the red rectangle indicates the selected receivers for analysis. The offset-dependent mute effect is visible after 0.7 s, obscuring the source bounce. (c) Frequency-wavenumber ( $f-k$ ) spectrum of the traces highlighted in (a), with the fundamental mode marked by a black dotted curve. The colours represent the seismic energy (low energy in cold colours / high energy in warm colours). (e) Depth inversion result of the picked dispersion curve, where colours represent different misfit values; the dark blue bold line signifies the final solution model. (b), (d), and (f) correspond to (a), (c), and (e), respectively, but for the rightmost shot.

### 4.3 Interpretation

The obtained  $V_s$  models align well with the inverted resistivity section (Fig. 2a). The  $V_s$  values of the shallow (5 - 10 m depth) high-velocity (2000 m/s) layer observed in the right part of the section (Fig. 3f) are indeed consistent with the presence of an ice-bearing permafrost layer (Kuehn et al., 2024) that overlies a lower velocity layer of unfrozen sediments. Conversely, at depths of 5 m and below, the inverted SRT model indicates  $V_p$  values that are too low to support this conclusion, with a maximum value of 1500 m/s, which is characteristic of liquid water-saturated sediments. This suggests the presence of a supra-permafrost water layer, which can be commonly found in rock glacier environments where the frozen layer acts as an aquiclude (Krainer et al., 2007; Pavoni et al., 2023; Arenson et al., 2022; Jones et al., 2019). As expected, the ERT model does not resolve the presence of a (thin) water-saturated layer (at least with a spacing of 3 m between the electrodes), nor does the MASW, which is sensitive to S-waves and thus insensitive to fluids. However, the ~ 1500 m/s P-wave velocities retrieved by the SRT method may indicate the presence of a (thin) water-saturated layer. In fact, such a layer may strongly attenuate body wave transmission and mask further impedance contrasts at depth (Pride et al., 2004). To verify this hypothesis, we performed full-wave (FW) seismic synthetic modelling (Chapter 5).

## 5 Synthetic data generation and comparison to field data

### 5.1 Synthetic modelling

To verify the reliability of the obtained results, we generated synthetic seismograms based on a simplified subsurface model derived from the joint interpretation of ERT, SRT and MASW results. Synthetic shot gathers are compared to the real ones in terms of surface waves and first-arrival times.

Synthetic seismic data are generated using SW4 3.0 (Petersson and Sjögreen, 2023), which solves the seismic wave equations in Cartesian coordinates for 3D heterogeneous media (Sjögreen and Petersson, 2012; Zhang et al., 2021). The conceptual model for the simulation is shown in Fig. 4. The left part of the model is characterised by three main layers: (i) a 5 m-thick debris layer, (ii) a 12 m-thick layer of more compacted sediments and (iii) the bedrock. On the right side of the section, we included a 5 m-thick ice-bearing layer, and we hypothesised a 1 m-thick water-saturated layer above it. This model serves as a simplified representation of the assumed real subsurface, where clearly, the shape, thickness, and composition of the different layers are not regular and homogeneous. Moreover, it does not reproduce the small-scale heterogeneities in the model that are beyond the resolution of our field surveys. However, it represents the main structures highlighted by the MASW, ERT and SRT results, with the velocity and thickness of the different layers compatible with the results illustrated in Chapter 4.

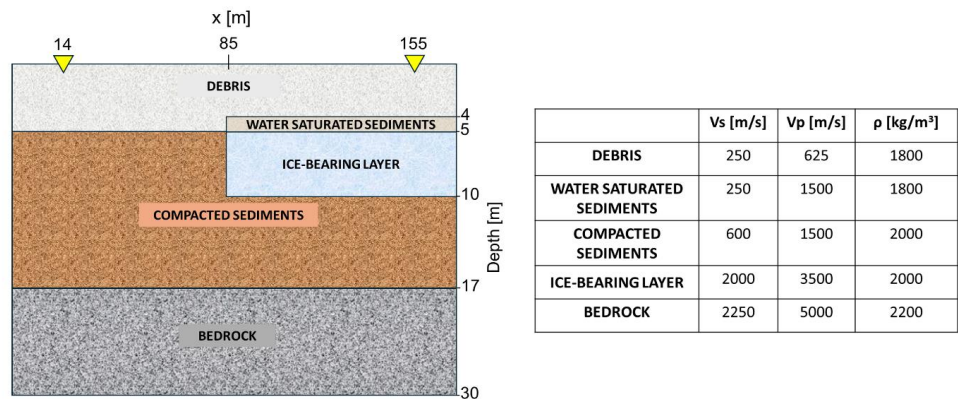

276  
277 **Figure 4: Conceptual model used for the synthetic seismic modelling with the SW4 software (Pettersson and Sjögreen,**  
278 **2023). The two yellow triangles denote the first and the last geophones in the array. Abbreviations as in Tab. 1.**

279 The simulation domain is 170 x 30 x 30 m in the x, y and z directions. The grid step used was 0.5 m, and the time  
280 step automatic setting was 0.87 ms, to comply with the stability criteria. Absorbing boundaries were included in  
281 the model to prevent the generation of reflections from the model edges, both at its bottom and laterally, while a  
282 free surface condition was set at the top. An array composed of 48 vertical receivers, with a spacing of 3 m, was  
283 placed in the middle of the model ( $14 \text{ m} \leq x \leq 155 \text{ m}$ ,  $y = 15 \text{ m}$ ) to reproduce the real case geometry. The source  
284 was a vertical point load at the surface with a central frequency of 15 Hz. Two simulations were run, corresponding  
285 to a shot on the left side of the array at the location of the first receiver and a shot on the right side at the last  
286 receiver location.

## 287 5.2 Comparison between synthetic and field data

288  
289 Figures 5a and 5b show the synthetic shot gathers as grayscale plots. When compared to Figs. 3a and 3b, it is clear  
290 how much noisier the field data are compared to the synthetic ones. This is the effect of scattering caused by the  
291 boulders and coarse debris at the surface of the rock glacier. Consequently, the real f-k spectra (Figs. 3c and 3d)  
292 are also noisier than the synthetic ones (Figs. 5c and 5d). However, the frequency and wavenumber distribution  
293 of the fundamental mode in the modelled data is similar to the field observations. This is confirmed by comparing  
294 the picking of modelled and real spectra (Figs. 5e and 5f). As highlighted in the scatterplots, the phase velocity  
295 values obtained by sampling the fundamental mode in the synthetic spectra show a high correlation with the  
296 corresponding values obtained from the field spectra ( $R^2$  value  $\sim 0.99$ ). Note that the comparison was made by  
297 considering the phase velocity values obtained in the common frequency range in sampling the field spectrum  
298 (Figs. 3c and 3d) and the synthetic spectrum (Figs. 5c and 5d), i.e., 20-35 Hz on the left side and 25-30 Hz on the  
299 right side.

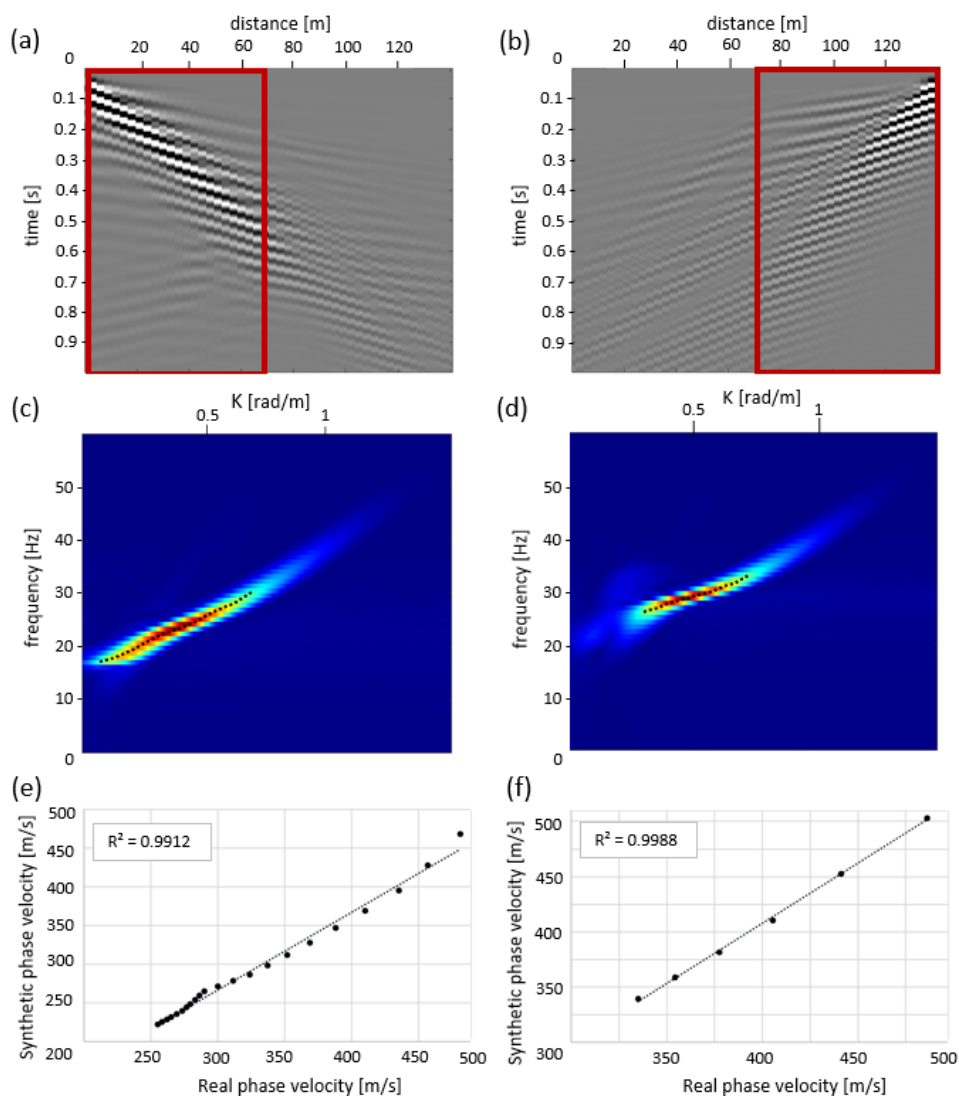

**Figure 5:** (a) Synthetic seismogram (grayscale plot) of the left shot, where the red rectangle indicates the selected receivers for analysis. (c) Frequency-wavenumber (f-k) spectrum of the traces highlighted in (a), with the fundamental mode marked by a black dotted curve. (e) Scatterplot of the phase velocity picking obtained from the real (Fig. 3c) and synthetic spectrum (Fig. 5c). The black dotted lines show a simple linear regression line with corresponding  $R^2$  values. (b), (d), and (f) correspond to (a), (c), and (e), respectively, but for the rightmost shot.

The modelled first-arrival times are very consistent with the field ones. Figure 6a shows the synthetic shot gathers (in wiggle mode and normalized trace by trace) produced with the source positions at the left side of the geophone array. The synthetic first-arrival times (red lines in Fig. 6a) align with those detected in the field seismogram obtained from the same shot position (Fig. 6c). This is also illustrated by the scatterplot and a high  $R^2$  value (0.97) indicating a high correlation (Fig. 6e). Even considering the source on the right side of the geophone array,



synthetic (Fig. 6b) and real (Fig. 6d) shot gathers show very similar first-arrival times (red lines in Figs. 6b and 6d), as also confirmed by the scatterplot and the high  $R^2$  value (0.95; Fig. 6f). However, in both the synthetic (Fig. 6b) and the acquired shot gather (Fig. 6d), the slopes of the refractions are compatible with the P-wave velocity of water ( $V_p = 1500$  m/s), even though the synthetic model contains a higher-velocity layer ( $V_p = 3500$  m/s) representing the ice-bearing permafrost (Fig. 4). This supports the hypothesis that a supra-permafrost water-saturated layer may have prevented the compressional wave transmission in greater depth, hiding refraction arrivals from deeper impedance contrasts.

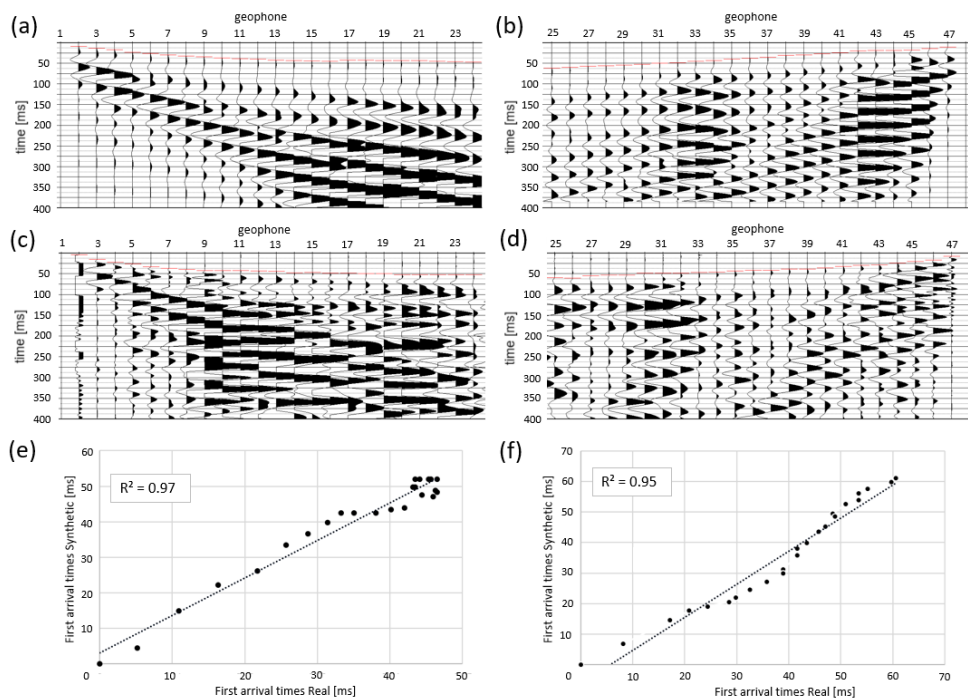

**Figure 6: Considering the conceptual model of Fig. 4a, (a) synthetic seismogram of the left shot plotted in wiggle mode (normalized trace by trace) and the picking (red lines in the traces) of first-arrival times for the first 24 traces; (c) field seismogram on the left shot plotted in wiggle mode and the picking (red lines in the traces) of first-arrival times for the first 24 traces; (e) scatterplot of synthetic first-arrival times and field ones for the left shot. The black dotted lines show a simple linear regression line with corresponding  $R^2$  values. (b), (d), and (f) correspond to (a), (c), and (e), respectively, but for the rightmost shot.**

The good agreement between synthetic and field data regarding surface wave dispersion and first-arrival times, demonstrates the validity of the simple conceptual model presented in Fig. 4, which was used for the forward simulation. However, slight differences in the synthetic and field picking of the fundamental mode and first-arrival times may relate to the simplification of the synthetic model, which could not account for the highly complex topography and the small-scale heterogeneities of shape, thickness, and composition in the different layers.



## 6 Discussion

### 6.1 Rock glacier subsurface model and rock glacier hydrology

Based on our presented ERT, SRT, MASW field data results, and FW seismic synthetic modelling, we constructed a subsurface model of the Flüela rock glacier (Fig.7).

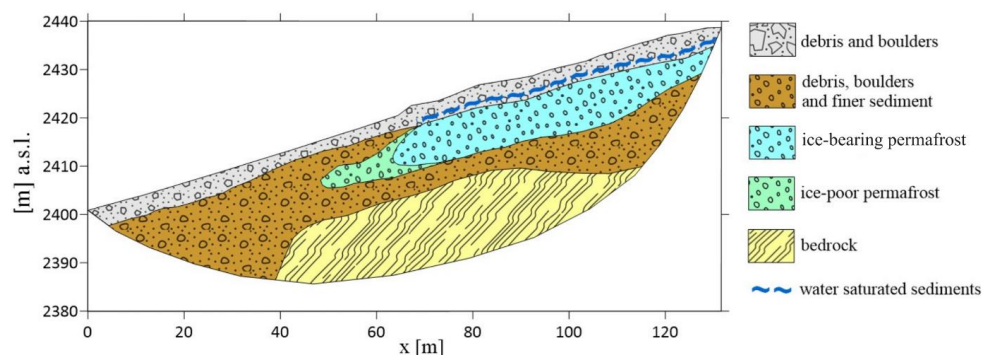

**Figure 7: Interpreted subsurface model of the Flüela rock glacier along the geophysical measuring line, derived from results of Electrical Resistivity Tomography (ERT), Seismic Refraction Tomography (SRT), Multichannel Analysis of Surface Waves (MASW), and Full-Wave (FW) seismic synthetic modelling.**

Four main units were identified. The uppermost layer, showing relatively high resistivity values (20 - 40 kΩm; Fig. 2a) and low seismic velocities ( $V_p < 600$  m/s and  $V_s \sim 250$  m/s; Fig. 2b and Figs. 3e-f), was interpreted as mainly composed of debris and blocks, with high porosity (air) and poor regarding fine sediments. The deeper unfrozen sediment layer, with lower resistivities ( $< 10$  kΩm) and relatively higher seismic velocities ( $V_p = 1200 - 1500$  m/s and  $V_s \sim 500$  m/s), was interpreted as a more heterogeneous compacted layer with both coarse and fine sediments. At the bottom of the model, the presence of bedrock was hypothesized, considering the sharp increase of  $V_p$  from 1200 - 1500 m/s to values  $> 3000$  m/s (up to 6000 m/s), and of  $V_s$  values from  $\sim 500$  m/s to  $\sim 2000$  m/s at  $\sim 14$  m depth for the left part of the section, and  $\sim 18$  m depth for the right part. Considering that MASW applies a 1D approximation, the  $V_p$  model was mainly used to define the bedrock depth spatially. Finally, the high resistivity values ( $> 80$  kΩm) identified in the right part of the resistivity model between  $\sim 5$  m and  $\sim 10$  m depth, corresponding to a sharp increase of  $V_s$  values (up to 2000 m/s), were interpreted as an ice-bearing permafrost layer. It should be noted that the high resistive layer also propagates beyond the middle of the array ( $50 < x < 65$  m), but with lower values ( $\sim 40$  kΩm), probably linked to a decrease in the ice content or an increase in temperature.

Considering that an ice-rich layer typically acts as an aquiclude (Giardino et al., 1992; Krainer et al., 2007; Pavoni et al., 2023a; Arenson et al., 2022), we hypothesized the presence of a water-saturated layer above the permafrost. The ice-bearing layer is likely not detected in the  $V_p$  model because, in SRT studies, the presence of a liquid-saturated layer can obstruct energy transmission in the deeper layers, thereby masking additional impedance contrasts at depth (Carcione and Picotti, 2006; Picotti et al., 2007; Shi et al., 2024). This behaviour was also reproduced in the synthetic seismic data, where the first-arrival times show typical velocities of liquid phases despite the presence of the ice-bearing layer.





This hypothesis can be further supported by the presence of a thin layer of fine-to-coarse sediments above a thicker, ice-bearing permafrost layer, as proposed by Boaga et al. (2024). These finer sediments are known to retain more water due to their smaller particle size, particularly if clay or silt is present (Hillel, 2003). However, without ground truthing, particularly drilling, we cannot obtain detailed subsurface information to confirm the exact structure and stratigraphy. Definitive statements regarding the ice and water content or the flow of water within the ice-bearing layer, such as intra-permafrost flow or the presence of taliks, cannot yet be made. Recent drilling in a rock glacier has revealed that areas identified as ice-rich using ERT and SRT methods can also contain significant amounts of liquid water and very fine sediments (personal observations by M. Phillips and A. Bast, SLF, 2024). Combining our methods with additional techniques could provide further insights into the hydrology of rock glaciers in the future. For example, Boaga et al. (2020) demonstrated that highly conductive anomalies in the subsurface, detected using Frequency Domain Electromagnetometry (FDEM) on a rock glacier, can indicate taliks or areas rich in liquid water.

## 6.2 Advancements and challenges in using MASW for rock glacier characterisation

Currently, the only two existing examples of MASW used for rock glacier characterisation are those by (i) Guillemot et al. (2021) at the Laurichard rock glacier, France, and (ii) Kuehn et al. (2024) at the Sourdough Rock Glacier, Alaska. However, in the first study, MASW was used in combination with other techniques to constrain a reference model of the unfrozen conditions for mechanical modelling of the rock glacier. In the second study, the aim of the study was to characterise the first few meters of a debris layer, achieved through a high-resolution seismic acquisition with sub-metre geophone spacing. Therefore, to our knowledge, the study presented here is the first successful application of MASW to derive structural information about rock glaciers, particularly concerning the presence of the frozen layer. Indeed, surface wave analysis in periglacial environments is not straightforward. Surface wave penetration depends on the ability to generate low frequencies, which in turn requires heavy sources. The logistical constraints due to the high-mountain environments might hinder this method. Seismic datasets acquired in these contexts are also very noisy due to the scattering produced by debris and boulders and are highly attenuated, which reflects unclear modal distribution and narrow usable frequency bands. The mountainous environment may also affect data quality due to harsh weather conditions, particularly wind, and complex topography. Furthermore, rock glaciers are often highly heterogeneous media that vary significantly in both space and depth; complex 2D/3D structures could generate dispersion images that are difficult to interpret, which challenges data processing and interpretation. For this reason, the choice of the spatial window for the analysis should be made carefully to achieve the best lateral resolution without compromising spectral resolution. In the case of the Flüela rock glacier, the most natural choice was to perform MASW on the lower and upper halves of the line due to the relatively homogeneous conditions on each side. At locations with greater heterogeneity, selecting a suitable window length may be more difficult.

## 7 Conclusions

In this study, we highlighted the potential limitations of the SRT technique in accurately imaging ice-bearing layers in high-mountain rock glaciers, a limitation that may also apply to other ice-rich permafrost environments.



401 This limitation may particularly arise in cases where a supra-permafrost water layer exists, acting as a preferential  
402 waveguide for seismic refractions and masking the underlying structures. This phenomenon has been observed at  
403 the Flüela rock glacier and has been reproduced through a full-wave forward seismic simulation based on a  
404 simplified conceptual model. Another well-known limitation of the SRT method is its inability to image velocity  
405 inversions in the subsurface, such as an unfrozen sediment layer between the ice-bearing layer and the bottom  
406 bedrock.

407 As shown in our study, the surface wave analysis has the potential to overcome both of these limitations. Surface  
408 waves can be recorded simultaneously with the collection of seismic refraction data as long as low-frequency  
409 geophones are used for the acquisition. The analysis of surface wave dispersion in the frequency-wavenumber  
410 ( $f - k$ ) spectrum, followed by the inversion of dispersion curves, enables the retrieval of  $V_s$  profiles, which are  
411 insensitive to the liquid phase (i.e., they are not affected by the presence of a supra-permafrost water-saturated  
412 layer). Moreover, the surface wave dispersion analysis can retrieve velocity inversions in depth and resolve the  
413 presence of a low-velocity layer between high-velocity layers. At the Flüela rock glacier, the dispersion images  
414 of the left and right sides of the seismic section look different in terms of frequency content and velocity  
415 distribution. The  $V_s$  profile produced by the inversion of the right-side dispersion curve clearly shows an increase  
416 of velocities at 5 m depth, attributed to the ice-bearing layer, and a decrease at about 10 m, compatible with the  
417 presence of unfrozen sediments. This demonstrates the effectiveness of MASW for imaging the ice-bearing layer  
418 and the underlying unfrozen sediments, even in the presence of a supra-permafrost water layer, as well as the  
419 potential to retrieve the thickness of the ice-bearing layer to support the ERT findings.

420 In the future, we plan to implement the MASW technique across various locations, particularly where we have  
421 borehole information on the subsurface stratigraphy, to further validate our findings. Additionally, we aim to  
422 enhance the surface wave analysis by incorporating passive seismic data, such as ambient seismic noise captured  
423 by seismic nodes, to extend our depth of penetration beneath the ice-rich layer to the seismic bedrock.

424 We recommend using low-frequency geophones and appropriate heavy sources whenever possible when  
425 collecting SRT profiles. This approach will enable complementary MASW analysis and provide valuable  
426 experience, which will undoubtedly benefit mountain permafrost research and enhance our understanding of ice  
427 and water content in ice-rich mountain permafrost, i.e., mountain permafrost hydrology.

428

429 *Data Availability Statement:* The datasets used to obtain the results presented in this work are available at the  
430 open-source repository <https://zenodo.org/uploads/14803564>. Furthermore, the ERT datasets will also be included  
431 in the International Database of Geoelectrical Surveys on Permafrost (IDGSP).

432 *Author contributing:* IB and MP developed the concept of the study; MP, JB, and AB collected the data; MP  
433 performed the data processing of ERT and SRT data; IB and SJGT performed the MASW analysis; all authors  
434 contributed to the interpretation of the results, writing and editing of the manuscript.

435 *Competing interests:* The contact author has declared that none of the authors has any competing interests.

436 *Acknowledgements:* The authors want to thank Dr Marcia Phillips for her valuable help and for pre-reviewing the  
437 manuscript.

438



439 *Financial support:* The project “Cold spot” is part of the excellence program: “The Geosciences for Sustainable  
440 Development” project (Budget Ministero dell’Università e della Ricerca - Dipartimenti di Eccellenza 2023–2027  
441 C93C23002690001).

## 442 **References**

443 Arenson, L., Hoelzle, M., and Springman, S.: Borehole deformation measurements and internal structure of some  
444 rock glaciers in Switzerland, *Permafrost and Periglacial Processes*, 13(2), 117–135,  
445 <https://doi.org/10.1002/ppp.414>, 2002.

446 Arenson, L., and Jakob, M.: Periglacial geohazard risks and ground temperature increases, *Eng. Geol. Soc.*  
447 *Territory*, 1, 233–237, [https://doi.org/10.1007/978-3-319-09300-0\\_44](https://doi.org/10.1007/978-3-319-09300-0_44), 2014.

448 Arenson, L. U., and Jakob, M.: Permafrost-related geohazards and infrastructure construction in mountainous  
449 environments, *Oxf. Res. Encycl. Nat. Hazard Sci.*, 30, <https://doi.org/10.1093/acrefore/9780199389407.013.292>,  
450 2017.

451 Arenson, L. U., and Sego, D. C.: The effect of salinity on the freezing of coarse-grained sands, *Can. Geotech. J.*,  
452 43, 325–337, <https://doi.org/10.1139/t06-006>, 2006.

453 Arenson, L. U., Harrington, J. S., Koenig, C. E. M., and Wainstein, P. A.: Mountain Permafrost Hydrology—A  
454 Practical Review Following Studies from the Andes, *Geosciences*, 12, 48,  
455 <https://doi.org/10.3390/geosciences12020048>, 2022.

456 Bast, A., Bründl, M., and Phillips, M.: CCAMM - A research program for studying the impacts of climate change  
457 on mass movements in alpine regions, *Interpraevent* 2024. Conference proceedings, 37–39, 2024a.

458 Bast, A., Kenner, R., and Phillips, M.: Short-term cooling, drying, and deceleration of an ice-rich rock glacier,  
459 *The Cryosphere*, 18, 3141–3158, <https://doi.org/10.5194/tc-18-3141-2024>, 2024b.

460 Bast, A., Pavoni, M., Lichtenegger, M., Buckel, J., and Boaga, J.: The use of textile electrodes for electrical  
461 resistivity tomography in periglacial, coarse blocky terrain: a comparison with conventional steel electrodes,  
462 *Permafrost and Periglacial Processes*, 36(1), 110–122, <https://doi.org/10.1002/ppp.2257>, 2025.

463 Bauer, K., Moeck, I., Norden, B., Schulze, A., Weber, M., and Wirth, H.: Tomographic P wave velocity and  
464 vertical velocity gradient structure across the geothermal site Groß Schönebeck (NE German Basin): relationship  
465 to lithology, salt tectonics, and thermal regime, *J. Geophys. Res. Solid Earth*, 115, B08312,  
466 <https://doi.org/10.1029/2009JB006895>, 2010.

467 Blanchy, G., Saneiyani, S., Boyd, J., McLachlan, P., and Binley, A.: ResIPy, an intuitive open source software for  
468 complex geoelectrical inversion/modelling, *Computers & Geosciences*, 137, 104423,  
469 <https://doi.org/10.1016/j.cageo.2020.104423>, 2020.

470 Boaga, J., Cassiani, G., Strobbia, C., and Vignoli, G.: Mode misidentification in Rayleigh waves: Ellipticity as a  
471 cause and a cure. *Geophysics* 78(4): EN17–EN28, <https://doi.org/10.1190/GEO20120194.1>, 2013.

472 Boaga, J., Phillips, M., Noetzli, J., Haberkorn, A., Kenner, R., and Bast, A.: A comparison of frequency domain  
473 electro-magnetometry, electrical resistivity tomography and borehole temperatures to assess the presence of ice  
474 in a rock glacier, *Frontiers in Earth Science*, 8, 586430, <https://doi.org/10.3389/feart.2020.586430>, 2020.

475 Boaga, J., Pavoni, M., Bast, A., and Weber, S.: Brief communication: On the potential of seismic polarity reversal  
476 to identify a thin low-velocity layer above a high-velocity layer in ice-rich rock glaciers, *The Cryosphere*, 18,  
477 3231–3236, <https://doi.org/10.5194/tc-18-3231-2024>, 2024.

478 Bohlen, T., Kugler, S., Klein, G., and Theilen, F.: 1.5D inversion of lateral variation of Scholte-wave dispersion,  
479 *Geophysics*, 69, 330344, <https://doi.org/10.1190/1.1707052>, 2004.

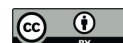

- 480 Boiero, D., and Socco, L.V.: The meaning of surface wave dispersion curves in weakly laterally varying  
481 structures, *Near Surface Geophysics*, 9, 561570, <https://doi.org/10.3997/1873-0604.2011042>, 2011.
- 482 Bommer, C., Phillips, M., and Arenson, L. U.: Practical recommendations for planning, constructing and  
483 maintaining infrastructure in mountain permafrost, *Permafrost and Periglacial Processes*, 21, 97–104,  
484 <https://doi.org/10.1002/ppp.679>, 2010.
- 485 Buckel, J., Mudler, J., Gardeweg, R., Hauck, C., Hilbich, C., Frauenfelder, R., Kneisel, C., Buchelt, S., Blöthe, J.  
486 H., Hördt, A., and Bückner, M.: Identifying mountain permafrost degradation by repeating historical electrical  
487 resistivity tomography (ERT) measurements, *The Cryosphere*, 17(7), 2919–2940, [https://doi.org/10.5194/tc-17-](https://doi.org/10.5194/tc-17-2919-2023)  
488 [2919-2023](https://doi.org/10.5194/tc-17-2919-2023), 2023.
- 489 Carcione, J. M., and Picotti, S.: P-wave seismic attenuation by slow-wave diffusion: Effects of inhomogeneous  
490 rock properties, *Geophysics*, 71(3), O1–O8, <https://doi.org/10.1190/1.2194512>, 2006.
- 491 Cicoira, A., Marcer, M., Gärtner-Roer, I., Bodin, X., Arenson, L. U., and Vieli, A.: A general theory of rock  
492 glacier creep based on in-situ and remote sensing observations, *Permafrost and Periglacial Processes*, 32(1), 139–  
493 153, <https://doi.org/10.1002/ppp.2090>, 2021.
- 494 Cicoira, A., Beutel, J., Faillettaz, J., and Vieli, A.: Water controls the seasonal rhythm of rock glacier flow, *Earth*  
495 *and Planetary Science Letters*, 528, 115844, <https://doi.org/10.1016/j.epsl.2019.115844>, 2019.
- 496 Day-Lewis, F. D., Johnson, C. D., Singha, K., Lane, J.W.J.: Best practices in electrical resistivity imaging: Data  
497 collection and processing, and application to data from Corinna, Maine, EPA Report, Boston, MA, 2008.
- 498 Duvillard, P. A., Ravanel, L., Marcer, M., and Schoeneich, P.: Recent evolution of damage to infrastructure on  
499 permafrost in the French Alps, *Reg. Environ. Change*, 19 (5), 1281–1293, [https://doi.org/10.1007/s10113-019-](https://doi.org/10.1007/s10113-019-01465-z)  
500 [01465-z](https://doi.org/10.1007/s10113-019-01465-z), 2019.
- 501 Everett, M. E.: *Near-Surface Applied Geophysics*. Cambridge University Press,  
502 <https://doi.org/10.1017/CBO9781139088435>, 2013.
- 503 Foti, S., Lai, C. G., Rix, G. J., and Strobbia, C.: *Surface wave methods for near-surface site characterization*, CRC  
504 Press, ISBN: 9781138077737, 2015.
- 505 Giardino, J.R., Vitek, J.D., and Demorett, J.L.: A model of water movement in rock glaciers and associated water  
506 characteristics, in: *Periglacial Geomorphology*, edited by: Dixon, J.C., and Abrahams, A.D., Routledge, London,  
507 159–184, <https://doi.org/10.4324/9781003028901-7>, 1992.
- 508 Guillemot, A., Baillet, L., Garambois, S., Bodin, X., Helmstetter, A., Mayoraz, R., and Larose, E.: Modal  
509 sensitivity of rock glaciers to elastic changes from spectral seismic noise monitoring and modelling, *The*  
510 *Cryosphere*, 15, 501–529, <https://doi.org/10.5194/tc-15-501-2021>, 2021.
- 511 Haeberli, W.: *Untersuchungen zur Verbreitung von Permafrost zwischen Flüelapass und Piz Grialetsch*  
512 *(Graubünden)*, Mitteilung der Versuchsanstalt für Wasserbau, Hydrologie und Glaziologie, ETH Zurich, Zurich,  
513 1975.
- 514 Haeberli, W., Käab, A., Wagner, S., Mühll, D. V., Geissler, P., Haas, J. N., ... and Wagenbach, D.: Pollen analysis  
515 and 14C age of moss remains in a permafrost core recovered from the active rock glacier Murtèl-Corvatsch, Swiss  
516 Alps: geomorphological and glaciological implications, *Journal of Glaciology*, 45(149), 1–8,  
517 <https://doi.org/10.3189/S0022143000002975>, 1999.
- 518 Haeberli, W., Hallet, B., Arenson, L., Elconin, R., Humlum, O., Käab, A., and Mühll, D. V.: Permafrost creep  
519 and rock glacier dynamics, *Permafrost and Periglacial Processes*, 17(3), 189–214, <https://doi.org/10.1002/ppp.561>,  
520 2006.
- 521 Hauck, C., and Kneisel, C.: *Applied Geophysics in Periglacial Environments*, Cambridge University Press., 2008.
- 522 Hauck, C., Böttcher, M., and Maurer, H.: A new model for estimating subsurface ice content based on combined  
523 electrical and seismic data sets, *The Cryosphere*, 5, 453–468, <https://doi.org/10.5194/tc-5-453-2011>, 2011.



- 524 Herrmann, R. B.: Computer Programs in Seismology, St Louis University, 1987.
- 525 Hu, Y., Arenson, L. U., Barboux, C., Bodin, X., Cicoira, A., Delaloye, R., Gärtner-Roer, I., Kääb, A., Kellerer-  
526 Pirklbauer, A., Lambiel, C., Liu, L., Pellet, C., Rouyet, L., Schoeneich, P., Seier, G., and Strozzi, T.: Rock Glacier  
527 Velocity: An Essential Climate Variable Quantity for Permafrost, *Reviews of Geophysics*, 63, e2024RG000847,  
528 <https://doi.org/10.1029/2024RG000847>, 2025.
- 529 Janke, J.R., Regmi, N.R., Giardino, J.R., and Vitek, J.D.: Rock glaciers, in: *Treatise on Geomorphology*, Elsevier  
530 Inc., Amsterdam, The Netherlands, 238–273, <https://doi.org/10.1016/B978-0-444-63369-9.00012-4>, 2013.
- 531 Jacquemart, M., Weber, S., Chiarle, M., Chmiel, M., Cicoira, A., Corona, C., Eckert, N., Gaume, J., Giacona, F.,  
532 Hirschberg, J., Kaitna, R., Magnin, F., Mayer, S., Moos, C., van Herwijnen, A., and Stoffel, M.: Detecting the  
533 impact of climate change on alpine mass movements in observational records from the European Alps, *Earth-  
534 Science Reviews*, 258, 104886, <https://doi.org/10.1016/j.earscirev.2024.104886>, 2024.
- 535 Jones, D. B., Harrison, S., Anderson, K., and Whalley, W. B.: Rock glaciers and mountain hydrology: A review,  
536 *Earth-Science Reviews*, 193, 66–90, <https://doi.org/10.1016/j.earscirev.2019.04.001>, 2019.
- 537 Kellerer-Pirklbauer, A., Bodin, X., Delaloye, R., Lambiel, C., Gärtner-Roer, I., Bonnefoy-Demongeot, M., ... and  
538 Zumiani, M.: Acceleration and interannual variability of creep rates in mountain permafrost landforms (rock  
539 glacier velocities) in the European Alps in 1995–2022, *Environmental Research Letters*, 19(3), 034022,  
540 <https://doi.org/10.1088/1748-9326/ad25a4>, 2024.
- 541 Kenner, R., Phillips, M., Hauck, C., Hilbich, C., Mulsow, C., Bühler, Y., ... and Buchroithner, M.: New insights  
542 on permafrost genesis and conservation in talus slopes based on observations at Flüelapass, Eastern Switzerland,  
543 *Geomorphology*, 290, 101–113, <https://doi.org/10.1016/j.geomorph.2017.04.011>, 2017.
- 544 Kenner, R., Noetzi, J., Hoelzle, M., Raetzo, H., and Phillips, M.: Distinguishing ice-rich and ice-poor permafrost  
545 to map ground temperatures and ground ice occurrence in the Swiss Alps. *The Cryosphere*, 13(7), 1925–1941,  
546 <https://doi.org/10.5194/tc-13-1925-2019>, 2019.
- 547 Kenner, R., Pruessner, L., Beutel, J., Limpach, P., and Phillips, M.: How rock glacier hydrology, deformation  
548 velocities and ground temperatures interact: Examples from the Swiss Alps, *Permafrost Periglac*, 31, 3–14,  
549 <https://doi.org/10.1002/ppp.2023>, 2020.
- 550 Kofler, C., Mair, V., Gruber, S., Todisco, M. C., Nettleton, I., Steger, S., ... and Comiti, F.: When do rock glacier  
551 fronts fail? Insights from two case studies in South Tyrol (Italian Alps), *Earth Surface Processes and Landforms*,  
552 46(7), 1311–1327, <https://doi.org/10.1002/esp.5099>, 2021.
- 553 Krainer, K. and Mostler, W.: Hydrology of Active Rock Glaciers: Examples from the Austrian Alps, Arctic,  
554 Antarctic, and Alpine Research, 34, 142–149, <https://doi.org/10.1080/15230430.2002.12003478>, 2002.
- 555 Krainer, K., Mostler, W., and Spötl, C.: Discharge from active rock glaciers, Austrian Alps: a stable isotope  
556 approach, *Austrian Journal of Earth Sciences*, 100, 102–112, 2007.
- 557 Krainer, K., Bressan, D., Dietre, B., Haas, J. N., Hajdas, I., Lang, K., ... and Tonidandel, D.: A 10,300-year-old  
558 permafrost core from the active rock glacier Lazaun, southern Ötztal Alps (South Tyrol, northern Italy),  
559 *Quaternary Research*, 83(2), 324–335, <https://doi.org/10.1016/j.yqres.2014.12.005>, 2015.
- 560 Kuehn, T., Holt, J. W., Johnson, R., and Meng, T.: Active seismic refraction, reflection, and surface wave surveys  
561 in thick debris-covered glacial environments, *Journal of Geophysical Research: Earth Surface*, 129,  
562 e2023JF007304, <https://doi.org/10.1029/2023JF007304>, 2024.
- 563 Lerjen, M., Kääb, A., Hoelzle, M., and Haeberli, W.: Local distribution pattern of discontinuous mountain  
564 permafrost. a process study at Flüela Pass, Swiss Alps, in: *Proceedings of the 8th International Conference on  
565 Permafrost*, Zurich, Switzerland, 667–672, ISBN: 90 5809 582 7, 2003.
- 566 Mair, V., Zischg, A., Lang, K., Tonidandel, D., Krainer, K., Kellerer-Pirklbauer, A., ... and Böckli, L.: PermaNET-  
567 Permafrost Long-term Monitoring Network. Synthesis report (Vol. 1), International Research Society  
568 INTERPRAEVENT, ISBN 978-3-901164-14-9, 2011.





- 569 Noetzli, J., Isaksen, K., Barnett, J., Christiansen, H. H., Delaloye, R., Etzel Müller, B., ... and Phillips, M.:  
570 Enhanced warming of European mountain permafrost in the early 21st century, *Nature Communications*, 15(1),  
571 1–15, <https://doi.org/10.1038/s41467-024-54831-9>, 2024.
- 572 Olafsdottir, E. A., Bessason, B., Erlingsson, S., and Kaynia, A. M.: A Tool for Processing and Inversion of MASW  
573 Data and a Study of Inter-session Variability of MASW, *Geotechnical Testing Journal*, 47(5), 1006–1025,  
574 <https://doi.org/10.1520/GTJ20230380>, 2024.
- 575 Park, C. B., Miller, R. D., and Xia, J.: Multichannel analysis of surface waves, *Geophysics*, 64(3), 800808,  
576 <https://doi.org/10.1190/1.1444590>, 1999.
- 577 Park, C. B., Miller, R. D., Xia, J., and Ivanov, J.: Multichannel analysis of surface waves (MASW) - active and  
578 passive methods, *The Leading Edge*, 26(1), 60–64, <https://doi.org/10.1190/1.2431832>, 2007.
- 579 Park, C., Richter, J., Rodrigues, R., and Cirone, A.: MASW applications for road construction and maintenance,  
580 *The Leading Edge*, 37(10), 724–730, <https://doi.org/10.1190/tle37100724.1>, 2018.
- 581 Pavoni, M., Carrera, A., and Boaga, J.: Improving the galvanic contact resistance for geoelectrical measurements  
582 in debris areas: A case study, *Near Surface Geophysics*, 20(2), 178–191, <https://doi.org/10.1002/nsg.12192>, 2022.
- 583 Pavoni, M., Boaga, J., Carrera, A., Zuecco, G., Carturan, L., and Zumiani, M.: Brief communication: Mountain  
584 permafrost acts as an aquitard during an infiltration experiment monitored with electrical resistivity tomography  
585 time-lapse measurements, *The Cryosphere*, 17, 1601–1607, <https://doi.org/10.5194/tc-17-1601-2023>, 2023a.
- 586 Pavoni, M., Boaga, J., Wagner, F. M., Bast, A., and Phillips, M.: Characterization of rock glaciers environments  
587 combining structurally-coupled and petrophysically-coupled joint inversions of electrical resistivity and seismic  
588 refraction datasets, *Journal of Applied Geophysics*, 215, 105097, <https://doi.org/10.1016/j.jappgeo.2023.105097>,  
589 2023b.
- 590 Petersson, N.A., and Sjögreen, B.: User's guide to SW4, version 3.0, LLNL-SM-741439 (LLNL-SM-741439),  
591 2023.
- 592 PERMOS 2020: Swiss Permafrost Bulletin 2018/2019. Pellet, C. and Noetzli, J. (eds.), 20 pp.,  
593 [doi.org/10.13093/permos-bull-2020](https://doi.org/10.13093/permos-bull-2020), 2020.
- 594 Phillips, M., Mutter, E. Z., Kern-Luetsch, M., and Lehning, M.: Rapid degradation of ground ice in a ventilated  
595 talus slope: Flüela Pass, Swiss Alps, *Permafrost Periglac.*, 20, 1–14, <https://doi.org/10.1002/ppp.638>, 2009.
- 596 Phillips, M., Buchli, C., Weber, S., Boaga, J., Pavoni, M., and Bast, A.: Brief communication: Combining  
597 borehole temperature, borehole piezometer and cross-borehole electrical resistivity tomography measurements to  
598 investigate seasonal changes in ice-rich mountain permafrost, *The Cryosphere*, 17, 753–760,  
599 <https://doi.org/10.5194/tc-17-753-2023>, 2023.
- 600 Picotti, S., Carcione, J. M., Germán Rubino, J., and Santos, J. E.: P-wave seismic attenuation by slow-wave  
601 diffusion: Numerical experiments in partially saturated rocks, *Geophysics*, 72(4), N11–N21,  
602 <https://doi.org/10.1190/1.2740666>, 2007.
- 603 Pride, S.R., Berryman, J.G., and Harris, J.M.: Seismic attenuation due to wave-induced flow, *Journal of*  
604 *Geophysical Research*, 109, B01201, <https://doi.org/10.1029/2003JB002639>, 2004.
- 605 RGIK. Towards standard guidelines for inventorying rock glaciers: baseline concepts (version 4.2.2), IPA Action  
606 Group Rock glacier inventories and kinematics, 13 pp, 2022.
- 607 Rücker, C., Günther, T., and Wagner, F. M.: pyGIMLi: An open-source library for modelling and inversion in  
608 geophysics, *Computers & Geosciences*, 109, 106–123, <https://doi.org/10.1016/j.cageo.2017.07.011>, 2017.
- 609 Sambridge, M.: Geophysical inversion with a neighbourhood algorithm: I. Searching a parameter space,  
610 *Geophysical Journal International*, 138(2), 479–494, <https://doi.org/10.1046/j.1365-246X.1999.00876.x>, 1999.
- 611 Scott, W. J., Sellmann, P., and Hunter, J. A.: Geophysics in the study of permafrost, *Geotechnical and*  
612 *environmental geophysics*, 1, 355–384, <https://doi.org/10.1190/1.9781560802785.ch13>, 1990.



- 613 Shi Z., He X., Chen D., and Wang X.: Seismic wave dispersion and attenuation resulting from multiscale wave-  
614 induced fluid flow in partially saturated porous media, *Geophysical Journal International*, 236, 1172–1182,  
615 <https://doi.org/10.1093/gji/ggad475>, 2024.
- 616 Sjögreen, B., and Petersson, N.A.: A Fourth Order Accurate Finite Difference Scheme for the Elastic Wave  
617 Equation in Second Order Formulation, *Journal of Scientific Computing*, 52(1), 17–48,  
618 <https://doi.org/10.1007/s10915-011-9531-1>, 2012.
- 619 Socco, L. V., Foti, S. and Boiero, D.: Surface-wave analysis for building near-surface velocity models -  
620 Established approaches and new perspectives, *Geophysics*, 75(5), 75A83–75A102,  
621 <https://doi.org/10.1190/1.3479491>, 2010.
- 622 Wagner, F.M., Mollaret, C., Günther, T., Kemna, A., and Hauck, C.: Quantitative imaging of water, ice and air in  
623 permafrost systems through petrophysical joint inversion of seismic refraction and electrical resistivity data,  
624 *Geophys. J. Int.*, 219(3), 1866–1875, <https://doi.org/10.1093/gji/ggz402>, 2019.
- 625 Wathelet, M.: An improved neighborhood algorithm: Parameter conditions and dynamic scaling, *Geophysical*  
626 *Research Letters*, 35(9), L09301, <https://doi.org/10.1029/2008GL033256>, 2008.
- 627 Williams, P. J.: Unfrozen Water Content of Frozen Soils and Soil Moisture Suction, *Géotechnique*, 14, 231–246,  
628 <https://doi.org/10.1680/geot.1964.14.3.231>, 1964.
- 629 Zhang, L., Wang, S., and Petersson, N.A.: Elastic Wave Propagation in Curvilinear Coordinates with Mesh  
630 Refinement Interfaces by a Fourth Order Finite Difference Method, *SIAM J. Sci. Comp.*, 43(2), A1472–A1496,  
631 <https://doi.org/10.1137/20M1339702>, 2021.
